# Supplementary material for: The Patient Perspective on the Impact of Tenosynovial Giant Cell Tumors on Daily Living: Crowdsourcing Study on Physical Function and Quality of Life
Source: PubMed Central journal article supplement (PMC5845102; doi:10.2196/ijmr.9325), 2018-02-23
Supplement: ijmr_v7i1e4_app4.pdf [file ijmr_v7i1e4_app4.pdf]

Supplementary material

Sensitivity analysis for EQ-5D-5L Utility score using USA and UK valuation sets

|                                  |                                                                                        | USA<br>valuation<br>set | USA<br>valuation<br>set | UK<br>valuation<br>set | UK<br>valuation<br>set |
|----------------------------------|----------------------------------------------------------------------------------------|-------------------------|-------------------------|------------------------|------------------------|
|                                  |                                                                                        | Score                   | P                       | Score                  | P                      |
| <b>Localized-TGCT<br/>(n 69)</b> | <b>Gender</b><br>Male   Female<br>(n 14 55)                                            | 0.81   0.75             | .18                     | 0.75   0.67            | .23                    |
|                                  | <b>Current age</b><br><40 years   ≥40 years<br>(n 33 36)                               | 0.77   0.77             | .99                     | 0.69   0.68            | .89                    |
|                                  | <b>TGCT localization</b><br>Knee   hip, ankle, foot<br>(n 53 16)                       | 0.77   0.74             | .41                     | 0.71   0.60            | .12                    |
|                                  | <b>Initial surgery (n 64)</b><br>Arthroscopy   open<br>synovectomy<br>(n 38 26)        | 0.76   0.77             | .92                     | 0.69   0.69            | .97                    |
|                                  | <b>Recurrence</b><br>Yes  no<br>(n 24 45)                                              | 0.70   0.80             | <b>.01</b>              | 0.59   0.74            | <b>.01</b>             |
|                                  | <b>Total number of surgeries<br/>(n 67)</b><br>1 surgery   ≥2 surgeries<br>(n 44 23)   | 0.79   0.71             | <b>.02</b>              | 0.73   0.60            | <b>.02</b>             |
|                                  | <b>Last treatment for TGCT</b><br>≤1 year   >1 year ago<br>(n 31 36)                   | 0.74   0.78             | .29                     | 0.66   0.71            | .38                    |
| <b>Diffuse-TGCT<br/>(n 230)</b>  | <b>Gender</b><br>Male   Female<br>(n 51 179)                                           | 0.75   0.71             | .17                     | 0.66   0.61            | .16                    |
|                                  | <b>Current age</b><br><40 years   ≥40 years<br>(n 105 125)                             | 0.72   0.72             | .89                     | 0.62   0.63            | .77                    |
|                                  | <b>TGCT localization</b><br>Knee   hip, ankle, foot<br>(n 170 60)                      | 0.73   0.71             | .40                     | 0.63   0.59            | .33                    |
|                                  | <b>Initial surgery (n 203)</b><br>Arthroscopy   open<br>synovectomy<br>(n 113 90)      | 0.73   0.70             | .25                     | 0.63   0.60            | .24                    |
|                                  | <b>Recurrence</b><br>Yes   no<br>(n 146 84)                                            | 0.70   0.75             | <b>.02</b>              | 0.60   0.67            | <b>.01</b>             |
|                                  | <b>Total number of surgeries<br/>(n 210)</b><br>1 surgery   ≥2 surgeries<br>(n 86 124) | 0.73   0.71             | .44                     | 0.63   0.61            | .45                    |
|                                  | <b>Last treatment for TGCT</b><br>≤1 year   >1 year ago<br>(n 72 138)                  | 0.70   0.73             | .17                     | 0.59   0.63            | .25                    |
