# Supplementary material for: The Patient Perspective on the Impact of Tenosynovial Giant Cell Tumors on Daily Living: Crowdsourcing Study on Physical Function and Quality of Life
Source: PubMed Central journal article supplement (PMC5845102; doi:10.2196/ijmr.9325), 2018-02-23
Supplement: ijmr_v7i1e4_app5.pdf [file ijmr_v7i1e4_app5.pdf]

**Supplementary material I - Comparing patients with medical proof to patients without medical proof**

|                                        | <b>Proof of TGCT<br/>(n 97<sup>a</sup>)</b> | <b>No proof of TGCT<br/>(n 202<sup>a</sup>)</b> |          |
|----------------------------------------|---------------------------------------------|-------------------------------------------------|----------|
|                                        | <b>n (%)</b>                                | <b>n (%)</b>                                    | <b>P</b> |
| Mean age at diagnosis in years<br>(SD) | 36.7 (13.2)                                 | 33.8 (12.0)                                     | .08      |
| Gender                                 |                                             |                                                 |          |
| Male   female                          | 24 (25%)   73 (75%)                         | 41 (20%)   161 (80%)                            | .38      |
| TGCT localization                      |                                             |                                                 |          |
| Knee   other joints                    | 70 (72%)   27 (28%)                         | 153 (76%)   49 (24%)                            | .49      |
| Initial surgery                        | n 85                                        | n 182                                           |          |
| Arthroscopy   open synovectomy         | 39 (46%)   46 (54%)                         | 112 (62%)   70 (38%)                            | .05      |
| Recurrence                             |                                             |                                                 |          |
| Yes   no                               | 49 (51%)   48 (49%)                         | 121 (60%)   81 (40%)                            | .13      |
| Number of surgeries                    | n 89                                        | n 188                                           |          |
| 1 surgery   ≥2 surgeries               | 48 (54%)   41 (46%)                         | 82 (44%)   106 (56%)                            | .55      |
|                                        | <b>Mean score</b>                           | <b>Mean score</b>                               | <b>P</b> |
| VAS worst pain<br>VAS score            | 3.6                                         | 3.7                                             | .81      |
| VAS worst stiffness<br>VAS score       | 3.8                                         | 4.0                                             | .55      |
| PROMIS-PF<br>T-score                   | 42.3                                        | 41.9                                            | .72      |
| SF-12<br>PCS score                     | 37.7                                        | 39.1                                            | .32      |
| SF-12<br>MSC score                     | 47.2                                        | 46.2                                            | .49      |
| EQ-5D-5L-DS<br>Utility score           | 0.7                                         | 0.7                                             | .72      |

*a, Unless listed otherwise.*
